# Supplementary material for: A symmetric multivariate leakage correction for MEG connectomes
Source: PubMed Central journal article supplement (PMC4528074; doi:10.1016/j.neuroimage.2015.03.071), 2015-08-15
Supplement: mmc2.pdf [file mmc2.pdf]

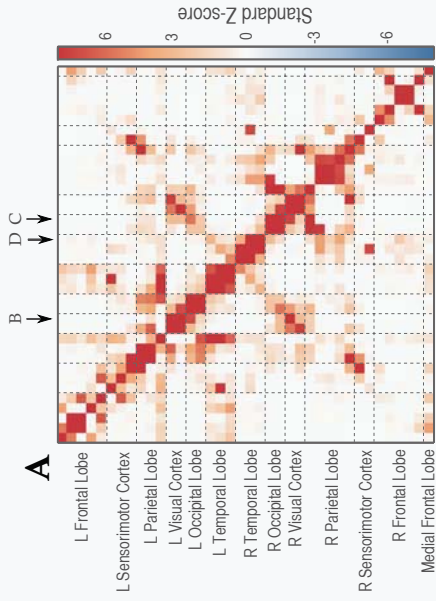

No Correction

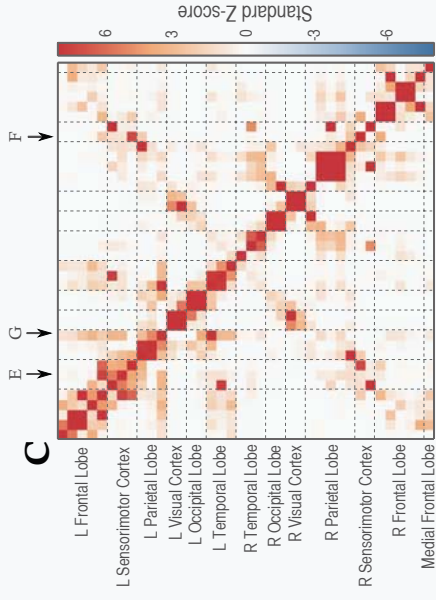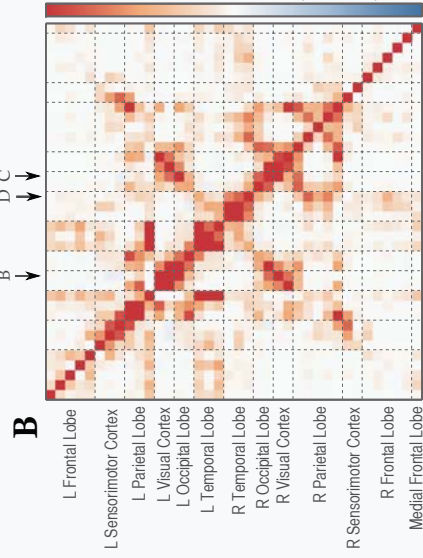

Symmetric Multivariate Leakage Correction

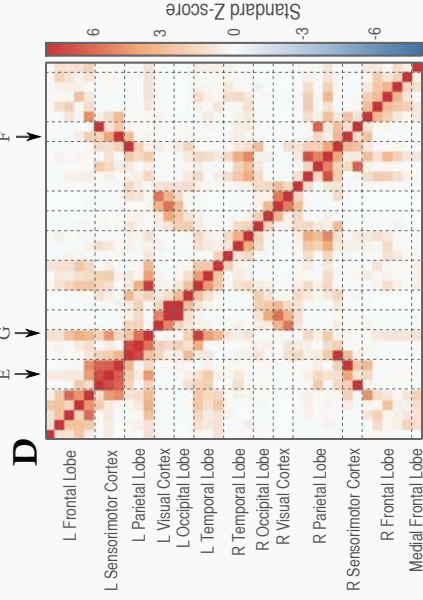

Alpha Band (8-13 Hz)

Beta Band (13-30 Hz)
