# Supplementary material for: A symmetric multivariate leakage correction for MEG connectomes
Source: PubMed Central journal article supplement (PMC4528074; doi:10.1016/j.neuroimage.2015.03.071), 2015-08-15
Supplement: mmc3.pdf [file mmc3.pdf]

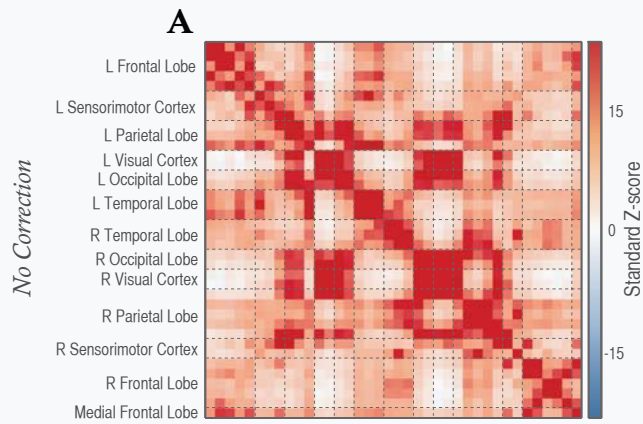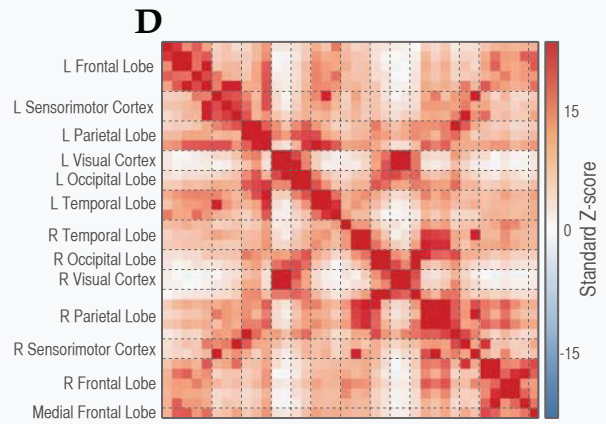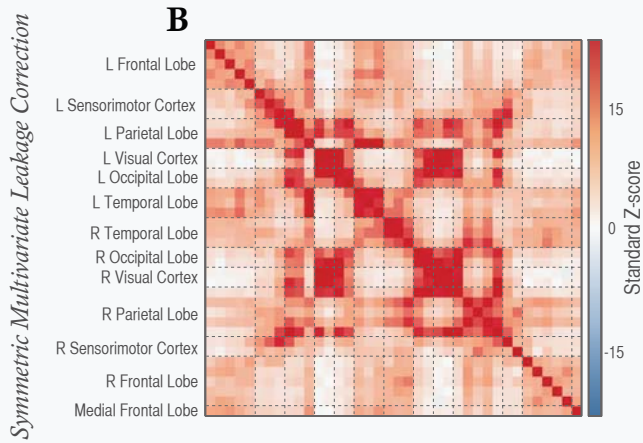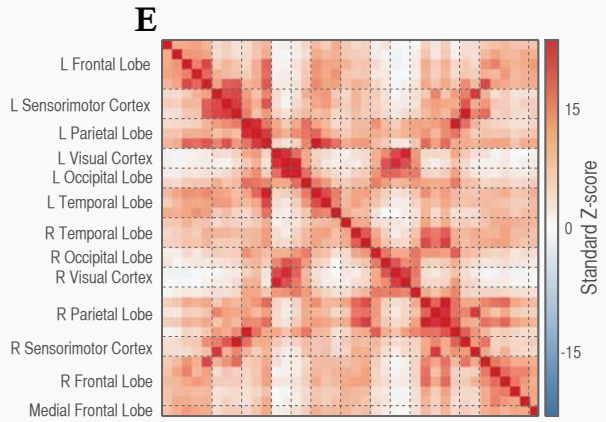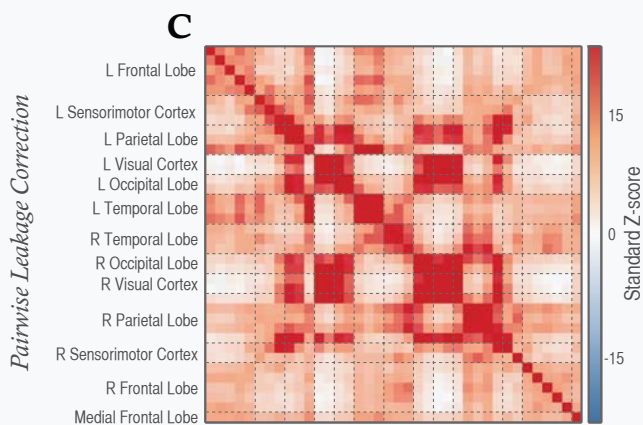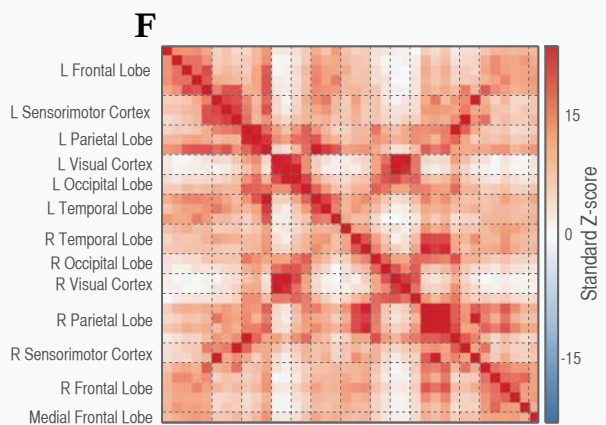

*Alpha Band (8-13 Hz)*

*Beta Band (13-30 Hz)*
