# Supplementary material for: A symmetric multivariate leakage correction for MEG connectomes
Source: PubMed Central journal article supplement (PMC4528074; doi:10.1016/j.neuroimage.2015.03.071), 2015-08-15

**A**

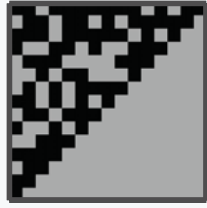

*Network matrix for 15 connected,  
randomly placed, dipoles*

**B**

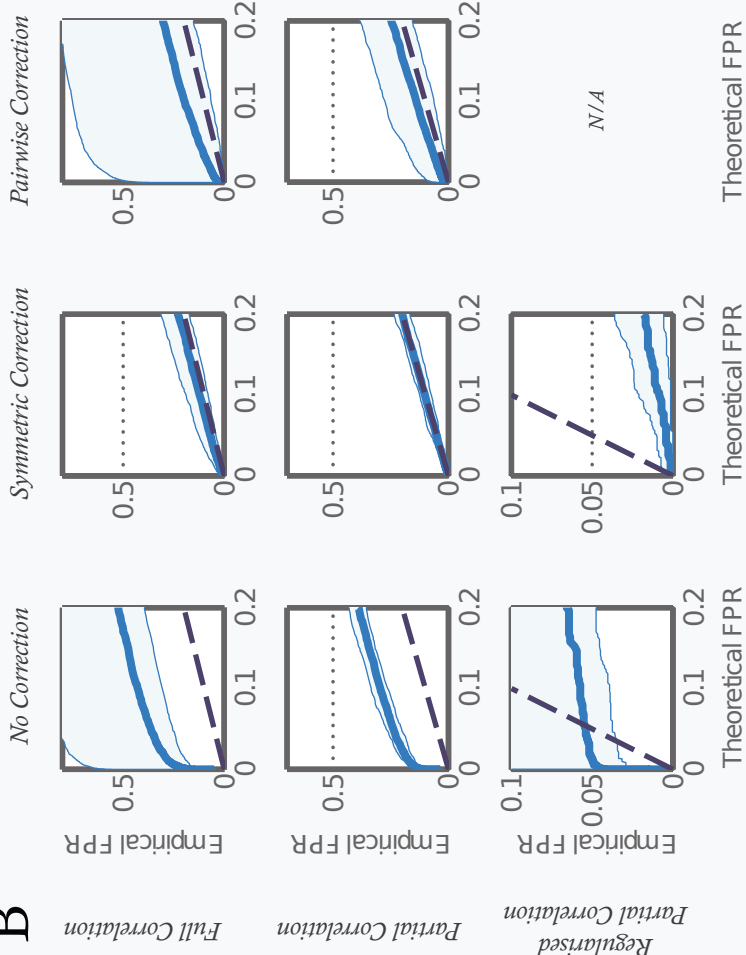

Supplement: mmc5.pdf [file mmc5.pdf]
