# Supplementary material for: A symmetric multivariate leakage correction for MEG connectomes
Source: PubMed Central journal article supplement (PMC4528074; doi:10.1016/j.neuroimage.2015.03.071), 2015-08-15

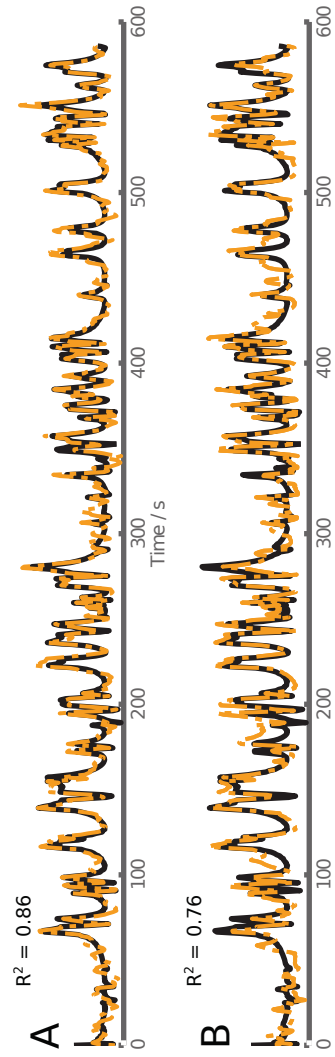

Supplement: mmc6.pdf [file mmc6.pdf]
